# Supplementary material for: DFT investigation on the mechanisms of Csp3–H functionalization of glycine derivatives induced by radical cation salt
Source: Royal Society of Chemistry journal article supplement (doi:10.1039/c9nj03946e), 2019-12-30
Supplement: c9nj03946e1.pdf [file c9nj03946e1.pdf]

**DFT Investigation the Mechanisms of Csp<sup>3</sup>-H functionalization of  
Glycine Derivatives Induced by Radical Cation Salt**

Da-Gang Zhou

*Chemical Synthesis and Pollution Control Key Laboratory of Sichuan Province*

*Institute of Synthesis and Application of Functional Materials*

*College of Chemistry and Chemical Engineering, China West Normal University, Shida Road 1#,*

*Nanchong 637002, P.R. China, E-mail: zhoudg2014@gmail.com*

**1.The Cartesian coordinates (Angstrom) for the optimized transition states  
obtained at the M06-2X-D3/6-311+G(d,p) level of theory in the solvent of CH<sub>3</sub>CN.**

**TS0(1)**

|    |             |             |             |
|----|-------------|-------------|-------------|
| N  | -0.02744200 | -0.01456300 | 0.60092900  |
| C  | 0.55414100  | 1.29543500  | 0.32776400  |
| C  | 1.67634700  | 1.66975800  | 1.07098700  |
| C  | 0.03315900  | 2.12700800  | -0.66290700 |
| C  | 2.27903500  | 2.89320100  | 0.82961100  |
| H  | 2.09048300  | 1.00673100  | 1.82591800  |
| C  | 0.64040400  | 3.35069500  | -0.90885900 |
| H  | -0.81801200 | 1.81813400  | -1.26054800 |
| C  | 1.75455000  | 3.72581300  | -0.15972500 |
| H  | 3.14642700  | 3.19221300  | 1.40675500  |
| H  | 0.25250400  | 3.99662500  | -1.68875200 |
| C  | -1.42485700 | -0.17499600 | 0.26141000  |
| C  | -1.86863800 | -1.24596700 | -0.51869900 |
| C  | -2.33005200 | 0.77561000  | 0.76417000  |
| C  | -3.21810700 | -1.35795900 | -0.80885900 |
| H  | -1.17121800 | -1.97014500 | -0.92424500 |
| C  | -3.67826400 | 0.65914100  | 0.47638300  |
| H  | -1.98039500 | 1.60409200  | 1.37345800  |
| C  | -4.11378400 | -0.40836100 | -0.30900200 |
| H  | -3.56774900 | -2.17190800 | -1.43412900 |
| H  | -4.37968900 | 1.38748800  | 0.86639700  |
| C  | 0.85808400  | -1.13747000 | 0.30549400  |
| C  | 0.67683700  | -2.33450700 | 1.00234000  |
| C  | 1.86519500  | -1.00514100 | -0.65014600 |
| C  | 1.51697200  | -3.40771500 | 0.74774800  |
| H  | -0.11715600 | -2.43945900 | 1.73643600  |
| C  | 2.69958800  | -2.08194700 | -0.91202300 |
| H  | 1.99212700  | -0.08059100 | -1.20352900 |
| C  | 2.52500600  | -3.27110800 | -0.20674700 |
| H  | 1.38776100  | -4.33572700 | 1.29357900  |
| H  | 3.47503900  | -1.99143000 | -1.66405000 |
| Br | 2.58156400  | 5.38693100  | -0.50226100 |
| Br | -5.94388200 | -0.57064300 | -0.71881500 |
| Br | 3.67899100  | -4.72455100 | -0.55152900 |
| H  | -0.10289100 | -0.03127700 | 1.96173400  |
| O  | -0.25236600 | -0.06310500 | 3.11480000  |
| O  | -1.46918000 | -0.37721400 | 3.34170100  |

**TS0(2)**

|    |             |             |             |
|----|-------------|-------------|-------------|
| N  | 0.01953100  | -0.00441700 | 0.59069800  |
| C  | 0.24928600  | 1.41205800  | 0.32535700  |
| C  | 1.21880300  | 2.07107800  | 1.08425300  |
| C  | -0.46173900 | 2.07748500  | -0.67278100 |
| C  | 1.47512000  | 3.41191100  | 0.84710500  |
| H  | 1.77610100  | 1.54333400  | 1.85308600  |
| C  | -0.20279300 | 3.41966500  | -0.91130400 |
| H  | -1.19458600 | 1.55215000  | -1.27590000 |
| C  | 0.76045300  | 4.07914000  | -0.14959300 |
| H  | 2.22178600  | 3.93532900  | 1.43236700  |
| H  | -0.73842700 | 3.94446000  | -1.69324100 |
| C  | -1.30256700 | -0.49578000 | 0.26001600  |
| C  | -1.48992000 | -1.60454900 | -0.56996200 |
| C  | -2.40197400 | 0.18529000  | 0.80932400  |
| C  | -2.77741300 | -2.02918400 | -0.85363000 |
| H  | -0.64557300 | -2.11475500 | -1.01885800 |
| C  | -3.68600200 | -0.24127900 | 0.52571800  |
| H  | -2.24826800 | 1.04397200  | 1.45645100  |
| C  | -3.86847800 | -1.35095600 | -0.30283900 |
| H  | -2.93592300 | -2.87523500 | -1.51197800 |
| H  | -4.53857600 | 0.27599100  | 0.94917500  |
| C  | 1.14233400  | -0.88556700 | 0.28899600  |
| C  | 1.17804500  | -2.13644300 | 0.91314200  |
| C  | 2.15423900  | -0.48804500 | -0.58441700 |
| C  | 2.23253700  | -2.99730000 | 0.65958800  |
| H  | 0.38343700  | -2.44312700 | 1.58714400  |
| C  | 3.20836000  | -1.35363900 | -0.84133000 |
| H  | 2.11851800  | 0.47724300  | -1.07706800 |
| C  | 3.24344500  | -2.59991300 | -0.21720700 |
| H  | 2.27225300  | -3.96694900 | 1.14130700  |
| H  | 3.99270300  | -1.06161300 | -1.53011700 |
| Br | 1.11162400  | 5.89964700  | -0.47611200 |
| Br | -5.60812100 | -1.93729000 | -0.69055500 |
| Br | 4.67415400  | -3.77251100 | -0.56476700 |
| H  | -0.03538800 | -0.06009800 | 1.94011000  |
| O  | -0.18064900 | -0.21103900 | 3.08690400  |
| O  | -1.17100000 | -1.00248800 | 3.23187100  |

**TS0(3)**

|    |             |             |             |
|----|-------------|-------------|-------------|
| N  | 0.00301000  | 0.00257700  | 0.61167900  |
| C  | 0.64584300  | 1.28194600  | 0.33597600  |
| C  | 1.76807300  | 1.62386400  | 1.09607500  |
| C  | 0.17960900  | 2.12531400  | -0.67269200 |
| C  | 2.42466600  | 2.81833600  | 0.84944500  |
| H  | 2.13135400  | 0.95635400  | 1.87391400  |
| C  | 0.84207100  | 3.31884300  | -0.92326400 |
| H  | -0.68079500 | 1.84589200  | -1.27271400 |
| C  | 1.96034500  | 3.66551200  | -0.16158100 |
| H  | 3.29074300  | 3.09856100  | 1.43788900  |
| H  | 0.49942900  | 3.97614000  | -1.71475700 |
| C  | -1.40372800 | -0.08517500 | 0.27721400  |
| C  | -1.90105300 | -1.09500400 | -0.55139600 |
| C  | -2.26592400 | 0.88270600  | 0.81871800  |
| C  | -3.25477500 | -1.13053000 | -0.84439800 |
| H  | -1.23452600 | -1.83219600 | -0.98597900 |
| C  | -3.61703200 | 0.84308400  | 0.52810600  |
| H  | -1.87363700 | 1.66085600  | 1.46812000  |
| C  | -4.11288400 | -0.16570900 | -0.30488600 |
| H  | -3.64905400 | -1.89585000 | -1.50344200 |
| H  | -4.28987700 | 1.58197700  | 0.94800700  |
| C  | 0.81656600  | -1.17111200 | 0.31577000  |
| C  | 0.53377600  | -2.36088800 | 0.99465600  |
| C  | 1.84797400  | -1.10901300 | -0.62175900 |
| C  | 1.28722900  | -3.49368200 | 0.73319200  |
| H  | -0.27548800 | -2.40472200 | 1.71886000  |
| C  | 2.59456600  | -2.24735100 | -0.89012600 |
| H  | 2.05887300  | -0.18489800 | -1.15042400 |
| C  | 2.31634100  | -3.43623100 | -0.21190700 |
| H  | 1.08444200  | -4.41889800 | 1.26082500  |
| H  | 3.38803700  | -2.21643700 | -1.62848600 |
| Br | 2.85282600  | 5.27550000  | -0.50173600 |
| Br | -5.93475400 | -0.22354800 | -0.71201200 |
| Br | 3.32649700  | -4.96943200 | -0.57563300 |
| H  | -0.06353300 | -0.00591200 | 1.97058600  |
| O  | -0.22618100 | -0.04688300 | 3.11393300  |
| O  | -1.39093800 | -0.53518600 | 3.30123200  |

**TS1a**

|    |             |             |             |
|----|-------------|-------------|-------------|
| N  | -0.48171500 | 0.28224900  | 0.01129600  |
| C  | -1.85338300 | -0.19318400 | -0.26592700 |
| C  | -2.79227700 | -0.03433400 | 0.74778200  |
| C  | -2.20848100 | -0.72425500 | -1.50139700 |
| C  | -4.10360400 | -0.44552800 | 0.54187000  |
| H  | -2.50779300 | 0.41382200  | 1.69589700  |
| C  | -3.52191400 | -1.13172500 | -1.71269300 |
| H  | -1.47915300 | -0.82387500 | -2.29910100 |
| C  | -4.45484000 | -0.99843800 | -0.68694900 |
| H  | -4.83572000 | -0.33556900 | 1.33465700  |
| H  | -3.80823300 | -1.54626300 | -2.67338600 |
| C  | 0.59181400  | -0.40416400 | -0.71791200 |
| C  | 1.70280800  | 0.29573900  | -1.18036700 |
| C  | 0.55007700  | -1.79836300 | -0.78712100 |
| C  | 2.76741400  | -0.40053700 | -1.74322200 |
| H  | 1.76333200  | 1.37491300  | -1.09824900 |
| C  | 1.61359800  | -2.49500200 | -1.34492200 |
| H  | -0.29803600 | -2.34938600 | -0.39036200 |
| C  | 2.71528400  | -1.78821600 | -1.82235700 |
| H  | 3.63579600  | 0.14369200  | -2.09843300 |
| H  | 1.58278700  | -3.57806700 | -1.39268700 |
| C  | -0.44957700 | 1.75532400  | -0.06261800 |
| C  | -0.26824200 | 2.50268900  | 1.09247300  |
| C  | -0.64155500 | 2.36781000  | -1.29857500 |
| C  | -0.25709000 | 3.89336900  | 1.01169000  |
| H  | -0.14433700 | 2.01886800  | 2.05562400  |
| C  | -0.62704500 | 3.75281300  | -1.38393400 |
| H  | -0.78815600 | 1.76985900  | -2.19399800 |
| C  | -0.42970600 | 4.50370700  | -0.22571900 |
| H  | -0.11670800 | 4.48573100  | 1.90915200  |
| H  | -0.76863200 | 4.23829600  | -2.34292000 |
| Br | -6.23655000 | -1.57426000 | -0.96770700 |
| Br | 4.17560000  | -2.73109300 | -2.56895100 |
| Br | -0.40181700 | 6.39380000  | -0.34145900 |
| C  | 4.93986400  | -1.06749000 | 1.28389200  |
| C  | 3.69646600  | -1.62528800 | 1.53007100  |
| C  | 2.62523600  | -0.80352600 | 1.93023500  |
| C  | 2.82842100  | 0.58260800  | 2.06902500  |
| C  | 4.07877200  | 1.11706100  | 1.81311100  |
| C  | 5.16093500  | 0.31113600  | 1.41979500  |
| H  | 5.75952800  | -1.70983300 | 0.97095000  |
| H  | 3.53169600  | -2.69375800 | 1.40938800  |
| H  | 2.00841000  | 1.23273000  | 2.35711200  |
| H  | 4.22584700  | 2.18964000  | 1.91382900  |

|   |             |             |            |
|---|-------------|-------------|------------|
| C | 6.50819200  | 0.90698400  | 1.17750400 |
| H | 6.43445400  | 1.88779700  | 0.69899400 |
| H | 7.04440400  | 1.05900600  | 2.12245300 |
| H | 7.13072000  | 0.26055300  | 0.55390300 |
| N | 1.39168800  | -1.38175100 | 2.13217100 |
| H | 1.31873700  | -2.37112900 | 1.90778000 |
| C | 0.21481100  | -0.73312400 | 2.48189300 |
| H | 0.34872500  | 0.14224700  | 3.11510400 |
| H | -0.25012500 | -0.07005600 | 1.18904500 |
| C | -0.91615800 | -1.58568100 | 2.86393300 |
| O | -1.82943900 | -1.22727700 | 3.59384200 |
| O | -0.85893800 | -2.78922600 | 2.25796500 |
| C | -1.99063400 | -3.67312000 | 2.47394200 |
| H | -1.99230000 | -3.97607200 | 3.52596200 |
| H | -2.90699400 | -3.10489300 | 2.28273000 |
| C | -1.83580600 | -4.83753000 | 1.53954700 |
| H | -0.90383200 | -5.37949500 | 1.72663200 |
| H | -2.66585900 | -5.53403600 | 1.68235400 |
| H | -1.84477800 | -4.51025900 | 0.49465600 |

**TS1b**

|   |             |             |             |
|---|-------------|-------------|-------------|
| C | 2.51992600  | -1.13552100 | -0.91213300 |
| C | 1.59980800  | -0.42876700 | -0.11175900 |
| C | 2.08313300  | 0.52769100  | 0.79909400  |
| C | 3.45067500  | 0.74967400  | 0.90522000  |
| C | 4.37776500  | 0.04744100  | 0.12404200  |
| C | 3.87779900  | -0.89608200 | -0.78968500 |
| H | 2.14712300  | -1.86959000 | -1.62243500 |
| H | 1.39484500  | 1.10577900  | 1.40834200  |
| H | 3.81025700  | 1.49637600  | 1.60983400  |
| H | 4.57246500  | -1.45191100 | -1.41590100 |
| N | 0.25846400  | -0.70589400 | -0.23923500 |
| C | -0.77730200 | -0.09327600 | 0.46834900  |
| H | -0.55849800 | 0.06979500  | 1.52669300  |
| C | -2.08046600 | -0.75053200 | 0.20976600  |
| O | -2.27124000 | -1.57673700 | -0.67010200 |
| O | -3.02159800 | -0.28248100 | 1.04298600  |
| C | -4.36638800 | -0.80549400 | 0.86230000  |
| H | -4.82711000 | -0.68542900 | 1.84429500  |
| H | -4.29599200 | -1.87139800 | 0.63143300  |
| C | -5.11426300 | -0.04749700 | -0.20164100 |
| H | -4.65026800 | -0.16955700 | -1.18416700 |
| H | -6.13842900 | -0.42661100 | -0.26423800 |
| H | -5.16717600 | 1.01936800  | 0.03556800  |
| H | -0.96498300 | 1.10049600  | 0.06750200  |
| O | -1.26355300 | 2.30241800  | -0.35901300 |
| O | -2.34740600 | 2.05811700  | -1.24089100 |
| H | -3.12386200 | 2.20536200  | -0.67250200 |
| C | 5.84861800  | 0.28276100  | 0.25656300  |
| H | 6.35018500  | -0.57700600 | 0.71689300  |
| H | 6.32174000  | 0.43170400  | -0.71977600 |
| H | 6.06131300  | 1.15799400  | 0.87564700  |
| H | -0.02630600 | -1.30703500 | -1.00708600 |

TS2(I)c

|   |             |             |             |
|---|-------------|-------------|-------------|
| C | 2.66914800  | -0.84046500 | -1.83563400 |
| C | 1.45733900  | -1.05614300 | -2.55886000 |
| C | 1.51839600  | -1.78499100 | -3.78541500 |
| C | 2.72052500  | -2.26392800 | -4.24713600 |
| C | 3.91893700  | -2.05735600 | -3.52837800 |
| C | 3.85835900  | -1.33306300 | -2.31682700 |
| H | 2.64142300  | -0.28868300 | -0.89898700 |
| H | 0.60031700  | -1.95179800 | -4.34348000 |
| H | 2.75603700  | -2.81701200 | -5.18205200 |
| H | 4.77429900  | -1.16500600 | -1.75673400 |
| N | 0.29155000  | -0.58651000 | -2.07283500 |
| C | -0.92177100 | -0.83261600 | -2.69117000 |
| C | -1.71161700 | -2.01255300 | -2.39301300 |
| O | -2.82444200 | -2.22203300 | -2.86259100 |
| O | -1.05762700 | -2.85402100 | -1.56000500 |
| C | -1.74792500 | -4.07734200 | -1.19379000 |
| H | -0.93930100 | -4.76756700 | -0.94408900 |
| H | -2.27685500 | -4.45461400 | -2.07280200 |
| C | -2.67425800 | -3.85801000 | -0.02863300 |
| H | -3.48820300 | -3.17435800 | -0.28676000 |
| H | -3.11789000 | -4.81269400 | 0.26827000  |
| H | -2.13525300 | -3.45385700 | 0.83412900  |
| H | -1.34031800 | -0.08432600 | -3.36012500 |
| N | -0.06451400 | 0.59570600  | 0.23892000  |
| C | -1.51789200 | 0.37363300  | 0.36535700  |
| C | -2.06673000 | -0.36669200 | 1.40473900  |
| C | -2.32806100 | 0.91656100  | -0.63343900 |
| C | -3.44074800 | -0.59041400 | 1.43152600  |
| H | -1.44736100 | -0.77628700 | 2.19541300  |
| C | -3.69725900 | 0.68882700  | -0.61161800 |
| H | -1.89291600 | 1.52208000  | -1.42391400 |
| C | -4.24113000 | -0.07564800 | 0.41791300  |
| H | -3.87361300 | -1.17075600 | 2.23921600  |
| H | -4.32629500 | 1.09765000  | -1.39483400 |
| C | 0.27929000  | 2.02489100  | 0.16190700  |
| C | 1.25863400  | 2.43398900  | -0.73604800 |
| C | -0.36161400 | 2.94080900  | 0.99113400  |
| C | 1.60217900  | 3.77987300  | -0.80969100 |
| H | 1.76125100  | 1.72185600  | -1.38233900 |
| C | -0.01849900 | 4.28574000  | 0.92307700  |
| H | -1.12279900 | 2.61070500  | 1.69229900  |
| C | 0.96000900  | 4.69332800  | 0.01962700  |
| H | 2.36010400  | 4.10628600  | -1.51291500 |
| H | -0.50998700 | 5.00336200  | 1.57097400  |



|    |             |             |             |
|----|-------------|-------------|-------------|
| C  | 0.76055800  | -0.17381300 | 1.18682400  |
| C  | 1.45952500  | 0.44461500  | 2.21530400  |
| C  | 0.83633600  | -1.55371500 | 0.99449600  |
| C  | 2.24783600  | -0.32675300 | 3.06573200  |
| H  | 1.40632700  | 1.51754800  | 2.36620500  |
| C  | 1.62222100  | -2.32427700 | 1.84100500  |
| H  | 0.28112300  | -2.02979200 | 0.18854200  |
| C  | 2.32436900  | -1.70099300 | 2.87056300  |
| H  | 2.79435300  | 0.15024200  | 3.87174300  |
| H  | 1.68585200  | -3.39693700 | 1.69168600  |
| Br | 3.40692100  | -2.74410100 | 4.02437100  |
| Br | -6.10255800 | -0.42886100 | 0.43238600  |
| Br | 1.42315400  | 6.52733100  | -0.08842400 |
| H  | 0.19371200  | 0.09011600  | -0.85864700 |
| C  | 5.20649600  | -2.61614400 | -4.01645500 |
| H  | 5.38799900  | -3.59939500 | -3.56305600 |
| H  | 5.20160600  | -2.76067700 | -5.09935700 |
| H  | 6.05359600  | -1.98340200 | -3.73915100 |

**TS2(I)d**

|   |             |             |             |
|---|-------------|-------------|-------------|
| C | -2.07389000 | 0.95351700  | -0.61118500 |
| C | -1.15831200 | -0.12983600 | -0.51673100 |
| C | -1.60699100 | -1.35096600 | 0.05487000  |
| C | -2.91465200 | -1.47905800 | 0.47360000  |
| C | -3.82889700 | -0.40871600 | 0.37999000  |
| C | -3.37289400 | 0.80552000  | -0.17173400 |
| H | -1.73959900 | 1.88900500  | -1.05160400 |
| H | -0.90851900 | -2.17837400 | 0.14529500  |
| H | -3.25124300 | -2.42447200 | 0.89261700  |
| H | -4.06493400 | 1.63998300  | -0.25539400 |
| N | 0.11077200  | 0.02893800  | -0.98329700 |
| C | 0.99790800  | -1.00108900 | -1.13714400 |
| C | 2.35481700  | -0.96365900 | -0.67244600 |
| O | 3.19122200  | -1.83584700 | -0.91938700 |
| O | 2.61128700  | 0.14008300  | 0.07337300  |
| C | 3.95267400  | 0.27571900  | 0.58702100  |
| H | 4.08298900  | 1.35334700  | 0.71382200  |
| H | 4.66005200  | -0.07914100 | -0.16794600 |
| C | 4.11675700  | -0.45938100 | 1.89228100  |
| H | 3.97456600  | -1.53565500 | 1.76121500  |
| H | 5.12405700  | -0.29569300 | 2.28678100  |
| H | 3.39944200  | -0.10153200 | 2.63662400  |
| H | 0.67625700  | -1.87136400 | -1.70318400 |
| H | 0.51044500  | 1.17608300  | -0.91531900 |
| C | -5.22463700 | -0.55006200 | 0.88154100  |
| H | -5.61429600 | -1.55811400 | 0.71098200  |
| H | -5.26593900 | -0.37792700 | 1.96518900  |
| H | -5.89766600 | 0.17431400  | 0.41508600  |
| O | 0.50547200  | 2.64385200  | 0.59522000  |
| H | -0.37683900 | 3.06180000  | 0.58927300  |
| O | 0.75008400  | 2.39856600  | -0.76179800 |

TS3(I)e

|   |             |             |             |
|---|-------------|-------------|-------------|
| C | 0.31960800  | 3.21908000  | -0.03207100 |
| C | 0.12258600  | 1.84888100  | -0.36485300 |
| C | 1.28387700  | 1.07170400  | -0.62166400 |
| C | 2.55675100  | 1.63189100  | -0.50952500 |
| C | 2.73657300  | 2.96944500  | -0.15920400 |
| C | 1.58331000  | 3.75502300  | 0.06845600  |
| H | -0.56173300 | 3.82522000  | 0.16339000  |
| H | 1.19108200  | 0.05675600  | -0.99194600 |
| H | 3.43004600  | 1.01464300  | -0.71479100 |
| H | 1.70493600  | 4.80306500  | 0.33644000  |
| N | -1.15299000 | 1.37976300  | -0.34536500 |
| C | -1.32554700 | 0.03732200  | -0.44931400 |
| H | -0.67902500 | -0.54822900 | -1.12167700 |
| C | -2.75107100 | -0.39279000 | -0.67326300 |
| O | -3.06359200 | -1.25585000 | -1.47403300 |
| O | -3.61434700 | 0.24367300  | 0.12300300  |
| C | -5.00507500 | -0.13754000 | -0.03511500 |
| H | -5.08931100 | -1.21449100 | 0.14105100  |
| H | -5.29887900 | 0.05376100  | -1.07181800 |
| C | -5.80936900 | 0.66670000  | 0.94355000  |
| H | -6.86698000 | 0.40571800  | 0.85281800  |
| H | -5.49881400 | 0.46651800  | 1.97272200  |
| H | -5.70739800 | 1.73859200  | 0.75409300  |
| C | 2.67621600  | -1.97767000 | 1.02256400  |
| C | 1.29789600  | -1.91917700 | 0.71548900  |
| C | 0.77462500  | -2.87829800 | -0.18191400 |
| C | 1.59777200  | -3.84888000 | -0.73671400 |
| C | 2.95468300  | -3.89579600 | -0.41182500 |
| C | 3.48993800  | -2.95530500 | 0.47225600  |
| H | 3.08993200  | -1.23379100 | 1.70063200  |
| H | -0.28151300 | -2.85873200 | -0.44219900 |
| H | 1.18035800  | -4.57639500 | -1.42720500 |
| H | 3.59272500  | -4.66019700 | -0.84636400 |
| H | 4.54594100  | -2.98624500 | 0.72559500  |
| C | 0.49525700  | -0.87890500 | 1.29239000  |
| H | 1.01843100  | -0.15664700 | 1.91607700  |
| C | -0.90023000 | -0.74437400 | 1.11822100  |
| H | -1.43460400 | -1.68715300 | 0.98369300  |
| H | -1.39996000 | -0.09220100 | 1.83131100  |
| C | 4.09855000  | 3.57217600  | -0.04236100 |
| H | 4.23664600  | 4.39254900  | -0.75589900 |
| H | 4.26093500  | 4.00145800  | 0.95270100  |
| H | 4.88352200  | 2.83395000  | -0.22343700 |

**TS3(D)f-1**

|    |             |             |             |
|----|-------------|-------------|-------------|
| C  | 0.05926400  | 3.99767200  | -1.78646100 |
| C  | -0.02640200 | 3.25419500  | -0.57938900 |
| C  | -1.30413600 | 3.08704200  | 0.01818900  |
| C  | -2.42848600 | 3.61278500  | -0.58632600 |
| C  | -2.34025000 | 4.32809500  | -1.79318700 |
| C  | -1.07108200 | 4.51560200  | -2.37700100 |
| H  | 1.04095400  | 4.12702800  | -2.23277700 |
| H  | -1.40175600 | 2.56982600  | 0.96796900  |
| H  | -3.40254800 | 3.47788800  | -0.12240400 |
| H  | -0.99375100 | 5.07347000  | -3.30661100 |
| N  | 1.14044500  | 2.72873600  | -0.12202500 |
| C  | 1.15750700  | 1.87322800  | 0.89362200  |
| H  | 0.34153000  | 1.79754500  | 1.62674900  |
| C  | 2.48334500  | 1.53508000  | 1.50280100  |
| O  | 2.58363300  | 1.20438700  | 2.67026900  |
| O  | 3.48165600  | 1.59359100  | 0.62127900  |
| C  | 4.77129400  | 1.12479100  | 1.10168800  |
| H  | 4.93191000  | 1.51304400  | 2.11064800  |
| H  | 5.49091000  | 1.58664000  | 0.42397200  |
| C  | 4.83315700  | -0.37824300 | 1.05589800  |
| H  | 5.83374700  | -0.71757800 | 1.33748600  |
| H  | 4.11674100  | -0.82504500 | 1.75061600  |
| H  | 4.61944300  | -0.74795700 | 0.04834500  |
| C  | -2.93759800 | -0.10777900 | 0.83697800  |
| C  | -1.54561300 | -0.18052000 | 1.02721900  |
| C  | -1.05679500 | -0.44368200 | 2.31806800  |
| C  | -1.93532000 | -0.63471400 | 3.37831000  |
| C  | -3.31288000 | -0.57083200 | 3.17371100  |
| C  | -3.81105500 | -0.30244000 | 1.89815100  |
| H  | -3.32343500 | 0.10098900  | -0.15960500 |
| H  | 0.01450900  | -0.49562400 | 2.50025300  |
| H  | -1.54090500 | -0.83356700 | 4.37080900  |
| H  | -3.99582500 | -0.72477700 | 4.00430800  |
| H  | -4.88297100 | -0.24367200 | 1.73181300  |
| C  | -0.65379500 | 0.01479800  | -0.13134000 |
| H  | -1.11090500 | 0.55500900  | -0.96986300 |
| C  | 0.75580800  | 0.14800800  | -0.00392400 |
| H  | 1.33600400  | 0.29692300  | -0.91166500 |
| H  | 1.26592200  | -0.46146500 | 0.74446700  |
| In | -0.66013000 | -2.05590800 | -1.18944800 |
| Cl | -2.34351200 | -2.06725200 | -2.84975800 |
| Cl | 1.43637400  | -2.59341400 | -2.15030300 |
| Cl | -1.19366500 | -3.70229900 | 0.42627200  |
| C  | -3.55589600 | 4.88386500  | -2.44679700 |

|   |             |            |             |
|---|-------------|------------|-------------|
| H | -3.45956800 | 5.96418000 | -2.60012400 |
| H | -3.69286300 | 4.44795700 | -3.44291900 |
| H | -4.45823300 | 4.69402300 | -1.86253900 |

**TS3(I)f-2**

|    |             |             |             |
|----|-------------|-------------|-------------|
| C  | 0.09338100  | 4.09519900  | -1.70732200 |
| C  | 0.18471800  | 3.30413300  | -0.50948700 |
| C  | -1.05158000 | 2.85267000  | 0.09160500  |
| C  | -2.28937200 | 3.18256700  | -0.51123100 |
| C  | -2.34499100 | 3.89241700  | -1.68994100 |
| C  | -1.11778700 | 4.35480300  | -2.27545300 |
| H  | 1.01990000  | 4.43539800  | -2.16231200 |
| H  | -1.04810900 | 2.63859200  | 1.15634900  |
| H  | -3.21250100 | 2.87681700  | -0.02235500 |
| H  | -1.17014500 | 4.92425600  | -3.20111800 |
| N  | 1.38187000  | 2.93196700  | -0.08538300 |
| C  | 1.37250900  | 1.91916800  | 0.89286100  |
| H  | 0.73672500  | 2.11405600  | 1.77076500  |
| C  | 2.74643600  | 1.56854400  | 1.41896700  |
| O  | 2.96903300  | 1.35680100  | 2.59845700  |
| O  | 3.64407700  | 1.44254900  | 0.43845000  |
| C  | 4.93614600  | 0.89164100  | 0.81508600  |
| H  | 5.23804800  | 1.32715300  | 1.77070500  |
| H  | 5.61290200  | 1.24186600  | 0.03387300  |
| C  | 4.86100300  | -0.61030200 | 0.87020900  |
| H  | 5.84531200  | -1.02486200 | 1.10457900  |
| H  | 4.16053500  | -0.94420500 | 1.64147400  |
| H  | 4.54030400  | -1.02135600 | -0.09171400 |
| C  | -3.01399100 | 0.07515600  | 0.63081900  |
| C  | -1.64661200 | 0.18911600  | 0.97139200  |
| C  | -1.26833200 | -0.07043400 | 2.30665500  |
| C  | -2.21821700 | -0.43398700 | 3.25174000  |
| C  | -3.56266300 | -0.56083300 | 2.89384300  |
| C  | -3.95542100 | -0.30466000 | 1.57888600  |
| H  | -3.32545100 | 0.30148500  | -0.38707000 |
| H  | -0.22391100 | 0.00896400  | 2.60025900  |
| H  | -1.90823300 | -0.62974500 | 4.27456900  |
| H  | -4.29876500 | -0.85773300 | 3.63548000  |
| H  | -4.99977900 | -0.39346700 | 1.29286600  |
| C  | -0.67844900 | 0.63892300  | -0.02719400 |
| H  | -1.02756000 | 0.72180800  | -1.05776000 |
| C  | 0.77790200  | 0.58631800  | 0.21191200  |
| H  | 1.33625400  | 0.46247600  | -0.71717300 |
| H  | 1.04709100  | -0.23787700 | 0.88462600  |
| In | -0.93430800 | -2.01825100 | -0.89824800 |
| Cl | -2.59250400 | -1.58547600 | -2.47361100 |
| Cl | 1.22146900  | -2.26428800 | -1.75674800 |
| Cl | -1.41605300 | -3.40236100 | 0.89883600  |

|   |             |            |             |
|---|-------------|------------|-------------|
| C | -3.63663900 | 4.22351000 | -2.35597800 |
| H | -3.75135900 | 5.30550400 | -2.48502600 |
| H | -3.67605000 | 3.78995100 | -3.36224100 |
| H | -4.49281200 | 3.84975300 | -1.78996800 |

**TS3(I)g**

|    |             |             |             |
|----|-------------|-------------|-------------|
| C  | 4.99127000  | 0.46570800  | -4.10746800 |
| C  | 4.28151100  | -0.72027700 | -3.82796300 |
| C  | 5.00711500  | -1.84777500 | -3.39376400 |
| C  | 6.38351700  | -1.76530600 | -3.21677000 |
| C  | 7.08774600  | -0.58471800 | -3.47209400 |
| C  | 6.35871000  | 0.52902200  | -3.93100900 |
| H  | 4.45988200  | 1.34593500  | -4.46644800 |
| H  | 4.51557000  | -2.80039800 | -3.22943800 |
| H  | 6.92544900  | -2.64681500 | -2.88173000 |
| H  | 6.88203500  | 1.45699300  | -4.14838200 |
| N  | 2.90198400  | -0.72041600 | -3.97264000 |
| C  | 2.16683900  | -1.77030100 | -3.56477800 |
| H  | 2.56965100  | -2.78087700 | -3.58260900 |
| C  | 0.73791500  | -1.66772800 | -3.94417400 |
| O  | 0.22960700  | -0.58228700 | -4.31182100 |
| O  | 0.07051300  | -2.77214200 | -3.85795900 |
| C  | -1.37189800 | -2.73457800 | -4.18618700 |
| H  | -1.45322600 | -2.39573100 | -5.22134100 |
| H  | -1.82730600 | -1.99024600 | -3.52876100 |
| C  | -1.90315000 | -4.11611600 | -3.97154900 |
| H  | -2.97185400 | -4.11940600 | -4.19816700 |
| H  | -1.41505200 | -4.83916700 | -4.62944500 |
| H  | -1.77539300 | -4.43518800 | -2.93416100 |
| In | 1.67890500  | 0.96571200  | -4.43210400 |
| Cl | 1.13906800  | 2.42958200  | -2.70521300 |
| Cl | 1.53938700  | 1.80589900  | -6.59260800 |
| C  | 4.75127500  | -3.79493800 | -0.13323400 |
| C  | 5.13688500  | -5.10365900 | 0.11685900  |
| C  | 4.29594600  | -6.15805300 | -0.24785900 |
| C  | 3.06575300  | -5.89699800 | -0.85964800 |
| C  | 2.66997900  | -4.59066000 | -1.10174200 |
| C  | 3.50827100  | -3.51254200 | -0.74020700 |
| H  | 5.40251900  | -2.96585200 | 0.13481000  |
| H  | 6.09316700  | -5.30757900 | 0.59011300  |
| H  | 4.59756900  | -7.18392200 | -0.05585000 |
| H  | 2.41663900  | -6.72017800 | -1.14384800 |
| H  | 1.70858400  | -4.40062400 | -1.57245500 |
| C  | 3.15349900  | -2.14174400 | -0.98120300 |
| H  | 3.90675900  | -1.39928500 | -0.71794900 |
| C  | 1.95382900  | -1.69809000 | -1.52070600 |
| H  | 1.09160000  | -2.36036700 | -1.47373800 |
| H  | 1.72889200  | -0.63708600 | -1.44661700 |
| C  | 8.56466200  | -0.49827200 | -3.27864100 |



|   |            |             |             |
|---|------------|-------------|-------------|
| H | 8.98148700 | -1.44499800 | -2.92821000 |
| H | 9.07119800 | -0.22528300 | -4.21068900 |
| H | 8.82111000 | 0.27826900  | -2.54961100 |

**TS3(I)h-1**

|    |             |             |             |
|----|-------------|-------------|-------------|
| C  | -1.68777500 | 2.78862400  | 1.56661600  |
| C  | -1.45736600 | 2.07761300  | 0.38349000  |
| C  | -0.27144900 | 2.34962400  | -0.38575100 |
| C  | 0.42384900  | 3.56917400  | -0.09983700 |
| C  | 0.17855300  | 4.29887900  | 1.04404900  |
| C  | -0.87554900 | 3.86517400  | 1.88571600  |
| H  | -2.51824300 | 2.50699200  | 2.20706000  |
| H  | -0.27040700 | 1.98868500  | -1.41437800 |
| H  | 1.22553800  | 3.87148200  | -0.76869800 |
| H  | -1.07934400 | 4.42201300  | 2.79817700  |
| N  | -2.25203200 | 1.03495800  | -0.00505200 |
| C  | -3.52427300 | 1.12210800  | -0.04089300 |
| H  | -4.06545700 | 2.05945000  | 0.13177500  |
| C  | -4.32540400 | -0.09839500 | -0.35199200 |
| O  | -3.85917000 | -1.19262900 | -0.60218400 |
| O  | -5.62472700 | 0.20739100  | -0.29483100 |
| C  | -6.56177200 | -0.87339700 | -0.57380600 |
| H  | -7.47016400 | -0.57172100 | -0.04985500 |
| H  | -6.17279600 | -1.78869200 | -0.12007600 |
| C  | -6.78280800 | -1.01987000 | -2.05439600 |
| H  | -7.53173700 | -1.79615500 | -2.23257900 |
| H  | -7.15110300 | -0.08787600 | -2.49181100 |
| H  | -5.86390800 | -1.31136300 | -2.57021300 |
| C  | 3.25319800  | 2.07997100  | 0.09822200  |
| C  | 2.24011800  | 1.31551400  | -0.49870200 |
| C  | 2.43678300  | 0.80719200  | -1.79017700 |
| C  | 3.62768700  | 1.05198500  | -2.46615300 |
| C  | 4.63625500  | 1.80188000  | -1.85912400 |
| C  | 4.44812600  | 2.31368400  | -0.57437300 |
| H  | 3.09645500  | 2.48273800  | 1.09785200  |
| H  | 1.65270100  | 0.22660000  | -2.27034200 |
| H  | 3.77032600  | 0.65690300  | -3.46788100 |
| H  | 5.56649900  | 1.99001300  | -2.38815500 |
| H  | 5.23190800  | 2.89498500  | -0.09746200 |
| C  | 1.00937900  | 1.02127800  | 0.27322700  |
| H  | 1.05733600  | 1.39279500  | 1.29954900  |
| C  | 0.41049600  | -0.31308700 | 0.14579200  |
| H  | 0.24476600  | -0.64062600 | -0.88489200 |
| H  | -0.50101400 | -0.44933900 | 0.72813300  |
| In | 1.79071300  | -1.74880700 | 0.95572300  |
| Cl | 2.77534600  | -3.52793800 | -0.20416100 |
| Cl | 2.72541300  | -1.63360700 | 3.10614300  |
| C  | 0.99333200  | 5.49640100  | 1.40728700  |

|   |            |            |            |
|---|------------|------------|------------|
| H | 0.36027900 | 6.36891900 | 1.59633500 |
| H | 1.56111800 | 5.31379400 | 2.32634300 |
| H | 1.70406600 | 5.74778300 | 0.61687600 |

**TS3(I)h-2**

|    |             |             |             |
|----|-------------|-------------|-------------|
| C  | -0.23175600 | 4.11058500  | -0.40897900 |
| C  | 0.02111800  | 2.87127700  | 0.24455400  |
| C  | -1.09696300 | 2.10168300  | 0.84954700  |
| C  | -2.40999200 | 2.79448600  | 0.84386400  |
| C  | -2.61292600 | 3.98682100  | 0.23758500  |
| C  | -1.48971200 | 4.63557800  | -0.40615100 |
| H  | 0.59622500  | 4.61299000  | -0.89833500 |
| H  | -0.84865500 | 1.80371700  | 1.88045400  |
| H  | -3.23078100 | 2.30121000  | 1.35780600  |
| H  | -1.66749900 | 5.58794000  | -0.90150700 |
| N  | 1.23484200  | 2.34111600  | 0.16955000  |
| C  | 1.50331600  | 1.28208300  | 0.91464200  |
| H  | 1.15615900  | 1.22021900  | 1.94865600  |
| C  | 2.75503700  | 0.47888600  | 0.66226000  |
| O  | 3.18474100  | -0.28298000 | 1.50120400  |
| O  | 3.27050700  | 0.68514400  | -0.53593000 |
| C  | 4.40914100  | -0.13485000 | -0.90546400 |
| H  | 5.09442700  | -0.18328900 | -0.05652800 |
| H  | 4.88004500  | 0.41517100  | -1.72041800 |
| C  | 3.94927100  | -1.50776000 | -1.34811500 |
| H  | 4.81782100  | -2.08979400 | -1.66954500 |
| H  | 3.46033600  | -2.04495700 | -0.53059700 |
| H  | 3.25628000  | -1.42791600 | -2.19034200 |
| C  | -3.56621700 | -0.00329300 | -0.44660800 |
| C  | -2.46908300 | -0.02413200 | 0.42503400  |
| C  | -2.56212600 | -0.76106200 | 1.62395300  |
| C  | -3.72832700 | -1.47661600 | 1.92617700  |
| C  | -4.80508200 | -1.45454500 | 1.04527600  |
| C  | -4.72347000 | -0.71107400 | -0.13589700 |
| H  | -3.49676000 | 0.55605700  | -1.37601900 |
| H  | -1.74487900 | -0.74432500 | 2.34525400  |
| H  | -3.78236500 | -2.04239400 | 2.85078800  |
| H  | -5.70604300 | -2.01469500 | 1.27413700  |
| H  | -5.56166700 | -0.69668600 | -0.82579600 |
| C  | -1.18176500 | 0.69881000  | 0.04736800  |
| H  | -1.25717500 | 0.96215300  | -1.01184100 |
| C  | 0.03984400  | -0.17902100 | 0.23241900  |
| H  | 0.31088300  | -0.54810100 | 1.22581900  |
| H  | 0.73969100  | -0.29493300 | -0.59383600 |
| In | -0.97004800 | -2.19145700 | -0.07445400 |
| Cl | -2.03785100 | -2.83766800 | -2.05688100 |
| Cl | -0.40827900 | -4.06549300 | 1.20878300  |
| C  | -3.94552000 | 4.67972400  | 0.21957100  |

|   |             |            |             |
|---|-------------|------------|-------------|
| H | -3.87306400 | 5.66340300 | 0.69488000  |
| H | -4.28039800 | 4.83986300 | -0.81063900 |
| H | -4.70151400 | 4.09190400 | 0.74463200  |

**TS3(D)i**

|    |             |             |             |
|----|-------------|-------------|-------------|
| C  | -2.55537900 | -0.75589300 | 0.01697800  |
| C  | -1.97770700 | 0.53988500  | 0.15611900  |
| C  | -2.86968000 | 1.64088600  | 0.27531200  |
| C  | -4.24954700 | 1.44226800  | 0.28838500  |
| C  | -4.80273100 | 0.16732100  | 0.17649200  |
| C  | -3.91995100 | -0.93029600 | 0.03122500  |
| H  | -1.88311400 | -1.60494400 | -0.08127100 |
| H  | -2.49092700 | 2.65691800  | 0.25697700  |
| H  | -4.90973700 | 2.30387100  | 0.37196400  |
| H  | -4.33640300 | -1.93118000 | -0.06486600 |
| N  | -0.62591900 | 0.61712900  | 0.22536800  |
| C  | -0.09777400 | 1.81740600  | 0.58249100  |
| H  | -0.53674800 | 2.75292300  | 0.20158300  |
| C  | 1.38390500  | 1.87534600  | 0.42848600  |
| O  | 1.99877600  | 2.91348600  | 0.08255500  |
| O  | 2.03123400  | 0.79365000  | 0.72769700  |
| C  | 3.50099600  | 0.81559100  | 0.61562800  |
| H  | 3.86146400  | 1.62864500  | 1.24989300  |
| H  | 3.74180400  | 1.04663000  | -0.42469700 |
| C  | 3.99521100  | -0.52919700 | 1.04762200  |
| H  | 5.08487600  | -0.54498100 | 0.97151400  |
| H  | 3.72470600  | -0.73918400 | 2.08493700  |
| H  | 3.59964100  | -1.32370300 | 0.41081200  |
| In | 1.64326500  | 4.84066200  | -0.58508400 |
| Cl | -0.43870100 | 4.95366400  | -1.63621100 |
| Cl | 3.46642100  | 5.08103700  | -2.02441100 |
| Cl | 1.92092700  | 6.05074600  | 1.39706400  |
| C  | -2.25675200 | 3.70692500  | 2.63541900  |
| C  | -3.56327300 | 3.91035500  | 3.13408300  |
| C  | -4.16662800 | 5.15748000  | 3.05686600  |
| C  | -3.49195400 | 6.22992000  | 2.46417500  |
| C  | -2.20346900 | 6.04437600  | 1.95531900  |
| C  | -1.59029300 | 4.80298300  | 2.04612100  |
| H  | -4.09239800 | 3.06857900  | 3.57688700  |
| H  | -5.16960100 | 5.29796200  | 3.45130100  |
| H  | -3.96946500 | 7.20352600  | 2.39692100  |
| H  | -1.67611600 | 6.87079300  | 1.48512800  |
| H  | -0.58486400 | 4.66941900  | 1.65244300  |
| C  | -1.66603100 | 2.40077000  | 2.69373000  |
| H  | -2.29618300 | 1.59856000  | 3.07373200  |
| C  | -0.32374800 | 2.10135100  | 2.35650800  |
| H  | 0.37868100  | 2.92711200  | 2.50153500  |
| H  | 0.05372900  | 1.16541800  | 2.76408500  |

|   |             |             |             |
|---|-------------|-------------|-------------|
| C | -6.27933300 | -0.05081300 | 0.19572700  |
| H | -6.61368000 | -0.59887100 | -0.69202000 |
| H | -6.57786000 | -0.65510500 | 1.06038200  |
| H | -6.82654700 | 0.89383800  | 0.24075500  |

**TS4(Dj)**

|   |             |             |             |
|---|-------------|-------------|-------------|
| C | -1.76412000 | -3.49178600 | -0.34151300 |
| C | -0.47078800 | -3.16965600 | -0.57973300 |
| C | -0.07207300 | -1.79612100 | -0.77104500 |
| C | -1.13205000 | -0.72216100 | -0.73360000 |
| C | -2.51535400 | -1.19823400 | -0.46772100 |
| C | -2.82464300 | -2.49827500 | -0.27933500 |
| H | -2.03634300 | -4.53384300 | -0.18236600 |
| H | 0.30804500  | -3.92720300 | -0.61091100 |
| C | -0.67964500 | 0.39468400  | 0.27094100  |
| H | -3.29837300 | -0.44200500 | -0.42770100 |
| C | 0.77534200  | 0.66580300  | 0.05876800  |
| C | 1.44578600  | -0.08173100 | -1.06213500 |
| H | 1.17879800  | 1.63667700  | 0.35244200  |
| N | 1.18495100  | -1.51124700 | -0.93858300 |
| C | 2.92742500  | 0.23467200  | -1.07123300 |
| O | 3.46499100  | 0.98526700  | -1.86063400 |
| O | 3.54367100  | -0.36530800 | -0.04309400 |
| C | 4.93147300  | -0.00078500 | 0.17433500  |
| H | 5.34852300  | -0.84475400 | 0.72684500  |
| H | 5.43062100  | 0.07209000  | -0.79541200 |
| C | 5.02059200  | 1.28450600  | 0.95227400  |
| H | 6.06710500  | 1.52180600  | 1.16227400  |
| H | 4.59086800  | 2.11729900  | 0.38813500  |
| H | 4.49412500  | 1.20321800  | 1.90854500  |
| H | 1.39278600  | -0.19376200 | 1.42105900  |
| H | -1.11412500 | -0.22961500 | -1.72374400 |
| C | -1.54441700 | 1.63065800  | 0.17803000  |
| C | -1.41096500 | 2.53378300  | -0.88409500 |
| C | -2.52316100 | 1.86788700  | 1.14779200  |
| C | -2.24034400 | 3.64892100  | -0.96994300 |
| H | -0.65433800 | 2.35784800  | -1.64793300 |
| C | -3.35308100 | 2.98300900  | 1.06350500  |
| H | -2.63288000 | 1.16484900  | 1.97206900  |
| C | -3.21318400 | 3.87685100  | 0.00376100  |
| H | -2.12630900 | 4.34283300  | -1.79906100 |
| H | -4.10885900 | 3.15283400  | 1.82591900  |
| H | -3.85758100 | 4.74906900  | -0.06377000 |
| H | -0.83185900 | -0.02883100 | 1.27833700  |
| H | 1.03933600  | 0.28794700  | -2.02323700 |
| O | 1.63513400  | -0.74995700 | 2.27960400  |
| O | 0.53564700  | -1.33062400 | 2.69308700  |
| C | -4.21745400 | -2.96748400 | -0.01050800 |
| H | -4.27824500 | -3.49908500 | 0.94625700  |



|   |             |             |             |
|---|-------------|-------------|-------------|
| H | -4.92516300 | -2.13524500 | 0.01668200  |
| H | -4.55235800 | -3.67566700 | -0.77731900 |

**TS4(I)k**

|   |             |             |             |
|---|-------------|-------------|-------------|
| C | -1.65300100 | -3.50103200 | 0.17366300  |
| C | -0.34599400 | -3.21200700 | -0.02167500 |
| C | 0.06853400  | -1.90439900 | -0.46709600 |
| C | -0.99718400 | -0.85811000 | -0.72792300 |
| C | -2.39938000 | -1.29313400 | -0.48242100 |
| C | -2.71602000 | -2.53623400 | -0.06274400 |
| H | -1.93800700 | -4.49292800 | 0.51943600  |
| H | 0.43385900  | -3.94496300 | 0.16533100  |
| C | -0.57445800 | 0.45667800  | -0.03197500 |
| H | -3.18808000 | -0.57375300 | -0.68942100 |
| C | 0.86304300  | 0.72929000  | -0.14643400 |
| C | 1.60071300  | -0.28228300 | -1.03570900 |
| H | 1.09499900  | 1.76993900  | -0.39240700 |
| N | 1.32992900  | -1.64041100 | -0.61177800 |
| C | 3.07144600  | 0.06931600  | -1.03821900 |
| O | 3.55655500  | 0.87493000  | -1.81170400 |
| O | 3.73715500  | -0.53505700 | -0.04996100 |
| C | 5.10468700  | -0.09324700 | 0.16086900  |
| H | 5.58835800  | -0.93846600 | 0.65352800  |
| H | 5.57551400  | 0.07096900  | -0.81177300 |
| C | 5.12160300  | 1.14638700  | 1.01449900  |
| H | 6.15323900  | 1.44864700  | 1.21472100  |
| H | 4.61640000  | 1.97686000  | 0.51271500  |
| H | 4.62739900  | 0.96799600  | 1.97444800  |
| H | 1.29137000  | 0.61377800  | 0.90959700  |
| H | -0.90687500 | -0.58779000 | -1.80094900 |
| C | -1.52436000 | 1.60210900  | -0.08375900 |
| C | -1.28695800 | 2.67060800  | -0.96381800 |
| C | -2.68201200 | 1.62396800  | 0.70984500  |
| C | -2.19573500 | 3.71970700  | -1.05889500 |
| H | -0.40547900 | 2.66101200  | -1.59973500 |
| C | -3.57598500 | 2.68495000  | 0.62711900  |
| H | -2.87030000 | 0.81050900  | 1.40699300  |
| C | -3.33747500 | 3.73365900  | -0.26071100 |
| H | -2.00775500 | 4.52938400  | -1.75833200 |
| H | -4.45966800 | 2.69373600  | 1.25829300  |
| H | -4.03943500 | 4.55995900  | -0.32855100 |
| H | -0.62499600 | 0.11132300  | 1.19957800  |
| H | 1.23391100  | -0.12824300 | -2.06535400 |
| O | 0.99271300  | 0.11341800  | 2.47275400  |
| O | -0.28268700 | -0.17257800 | 2.35390400  |
| C | -4.12605500 | -2.97501400 | 0.15976600  |
| H | -4.27380500 | -3.31343100 | 1.19168900  |

|   |             |             |             |
|---|-------------|-------------|-------------|
| H | -4.83662300 | -2.16975500 | -0.04062800 |
| H | -4.38101900 | -3.82584400 | -0.48242400 |

**TS5(Dj)**

|   |             |             |             |
|---|-------------|-------------|-------------|
| C | 0.53802400  | -3.52731900 | -0.90878500 |
| C | -0.40572400 | -3.14624800 | -0.00246100 |
| C | -0.53387700 | -1.77212600 | 0.40814800  |
| C | 0.59150800  | -0.87659700 | 0.04962100  |
| C | 1.43326600  | -1.29229600 | -1.05146700 |
| C | 1.44863000  | -2.58907800 | -1.50043400 |
| H | 0.58059300  | -4.56404400 | -1.23594200 |
| H | -1.14230400 | -3.84958600 | 0.37562300  |
| C | 0.40753700  | 0.55507300  | 0.38368800  |
| H | 2.12469400  | -0.57134500 | -1.48056100 |
| C | -0.70519300 | 0.91680500  | 1.05785100  |
| C | -1.80024300 | -0.03906800 | 1.40311000  |
| H | -0.84738000 | 1.95192100  | 1.36282600  |
| N | -1.59207800 | -1.43206700 | 1.09802200  |
| C | -3.05803900 | 0.49273400  | 0.69343000  |
| O | -3.80575000 | 1.31393300  | 1.18043200  |
| O | -3.15062300 | -0.00248000 | -0.54469400 |
| C | -4.19108500 | 0.57416500  | -1.38028400 |
| H | -4.37197500 | -0.18548700 | -2.14221400 |
| H | -5.09441300 | 0.69746800  | -0.77788100 |
| C | -3.72608300 | 1.87498500  | -1.97659400 |
| H | -4.48917300 | 2.26843700  | -2.65399400 |
| H | -3.54513700 | 2.62236800  | -1.19952200 |
| H | -2.80366800 | 1.73575900  | -2.54788600 |
| H | 1.34865800  | -1.26172200 | 1.05382800  |
| C | 1.45404900  | 1.54961600  | 0.07772200  |
| C | 2.81746200  | 1.25596800  | 0.23828600  |
| C | 1.09399200  | 2.83990800  | -0.33989200 |
| C | 3.78565900  | 2.22771200  | 0.00515000  |
| H | 3.12746700  | 0.26650200  | 0.56667200  |
| C | 2.06361300  | 3.80750000  | -0.57993800 |
| H | 0.04226100  | 3.07451800  | -0.48863100 |
| C | 3.41325300  | 3.50595300  | -0.40581300 |
| H | 4.83480400  | 1.98389400  | 0.14811900  |
| H | 1.76358700  | 4.79875600  | -0.90896000 |
| H | 4.17086700  | 4.26177500  | -0.59218600 |
| H | -2.03629600 | 0.04993400  | 2.47286300  |
| O | 1.01328200  | -1.43428900 | 3.10086700  |
| O | 1.90324200  | -1.58159700 | 2.19570800  |
| C | 2.36809400  | -3.04100300 | -2.58500600 |
| H | 1.81162900  | -3.47954800 | -3.42064800 |
| H | 2.97324200  | -2.21730700 | -2.97031700 |
| H | 3.04680800  | -3.82247400 | -2.22385100 |

**TS2(II)**

|   |             |             |             |
|---|-------------|-------------|-------------|
| C | -0.62220700 | -3.03951500 | 0.31744800  |
| C | -0.30757500 | -1.79699500 | -0.26101700 |
| C | -1.35169700 | -1.00963100 | -0.77167100 |
| C | -2.66486500 | -1.45922500 | -0.69022400 |
| C | -2.99237100 | -2.69269800 | -0.11606800 |
| C | -1.93789800 | -3.47073200 | 0.38361700  |
| H | 0.18101400  | -3.65563400 | 0.71605400  |
| H | -1.14820600 | -0.04268600 | -1.22236000 |
| H | -3.45945500 | -0.82660800 | -1.08280100 |
| H | -2.15572200 | -4.43407100 | 0.84090700  |
| N | 1.02357700  | -1.41074500 | -0.32343900 |
| C | 1.48336300  | -0.15039000 | -0.62343000 |
| H | 0.86008700  | 0.45247800  | -1.27401000 |
| C | 2.91498100  | 0.05516000  | -0.76794600 |
| O | 3.41887700  | 1.05960100  | -1.25578500 |
| O | 3.62749300  | -0.95884100 | -0.21414100 |
| C | 5.05622300  | -0.74900100 | -0.12567600 |
| H | 5.40170800  | -0.29436800 | -1.05797900 |
| H | 5.47442700  | -1.75445100 | -0.04664700 |
| C | 5.40179400  | 0.09997800  | 1.06928500  |
| H | 6.48729900  | 0.20414300  | 1.15275200  |
| H | 4.97203900  | 1.10134000  | 0.97624900  |
| H | 5.03290800  | -0.35340100 | 1.99401900  |
| C | -2.41658500 | 2.00550100  | 1.16145100  |
| C | -1.06328800 | 2.05680300  | 0.76133900  |
| C | -0.73037500 | 2.91534200  | -0.31095700 |
| C | -1.70243500 | 3.68260200  | -0.93856800 |
| C | -3.03510000 | 3.62064400  | -0.52398200 |
| C | -3.38484000 | 2.77541000  | 0.53086300  |
| H | -2.69412000 | 1.33703800  | 1.97516600  |
| H | 0.29913100  | 2.96959900  | -0.65898200 |
| H | -1.42210400 | 4.33085700  | -1.76519200 |
| H | -3.79260000 | 4.21984300  | -1.02165800 |
| H | -4.41955900 | 2.71435700  | 0.85872800  |
| C | -0.09388800 | 1.20751400  | 1.40947700  |
| H | -0.49420400 | 0.49754400  | 2.13453100  |
| C | 1.25052700  | 1.13251700  | 1.08427200  |
| H | 1.73664800  | 1.96042300  | 0.57134500  |
| H | 1.90729300  | 0.55209400  | 1.72942100  |
| C | -4.40769600 | -3.17519700 | -0.05552500 |
| H | -4.60563200 | -3.94181500 | -0.81472200 |
| H | -4.64043000 | -3.62962300 | 0.91304100  |
| H | -5.11718500 | -2.36095600 | -0.22633500 |

H 1.68425400 -2.02547900 0.13582600

**TS3(II)**

|   |             |             |             |
|---|-------------|-------------|-------------|
| C | -0.58768700 | -2.31591800 | 0.87788300  |
| C | 0.04094400  | -1.42532200 | -0.02264000 |
| C | -0.76270100 | -0.59498600 | -0.85156700 |
| C | -2.16967800 | -0.69337700 | -0.77825300 |
| C | -2.78551500 | -1.53952200 | 0.11930000  |
| C | -1.95834600 | -2.35713500 | 0.94201200  |
| H | 0.02666600  | -2.93640300 | 1.52398000  |
| H | -0.31742800 | -0.12202300 | -1.72090600 |
| H | -2.77040500 | -0.07271800 | -1.43877900 |
| H | -2.43337700 | -3.02690700 | 1.65535100  |
| N | 1.39086000  | -1.29340800 | -0.05072100 |
| C | 1.95357700  | -0.07445200 | -0.53894300 |
| H | 1.69386600  | 0.06476200  | -1.59589500 |
| C | 3.46731000  | -0.03417700 | -0.46781800 |
| O | 4.10008600  | 0.95546900  | -0.77128300 |
| O | 3.98373000  | -1.19255800 | -0.05492500 |
| C | 5.43722600  | -1.23658300 | 0.06556900  |
| H | 5.86479100  | -0.71255600 | -0.79255700 |
| H | 5.67323100  | -2.29913300 | -0.00909100 |
| C | 5.88337500  | -0.64332100 | 1.37281500  |
| H | 6.96811400  | -0.74095800 | 1.46688000  |
| H | 5.63255900  | 0.41881500  | 1.43119600  |
| H | 5.42185800  | -1.16067500 | 2.21832500  |
| C | -2.11375500 | 2.63969600  | -0.23730900 |
| C | -0.78050200 | 2.31410000  | -0.56688200 |
| C | -0.17375000 | 2.96000300  | -1.66482300 |
| C | -0.87777300 | 3.90399600  | -2.39570100 |
| C | -2.19253900 | 4.22496300  | -2.04751900 |
| C | -2.80905300 | 3.59109200  | -0.96703600 |
| H | -2.58611200 | 2.13199300  | 0.60088900  |
| H | 0.84922700  | 2.71746800  | -1.94099100 |
| H | -0.40322800 | 4.39874000  | -3.23770800 |
| H | -2.73618400 | 4.97158900  | -2.61944000 |
| H | -3.83087500 | 3.84146800  | -0.69867900 |
| C | -0.09588300 | 1.32560700  | 0.22234000  |
| H | -0.63151200 | 0.99081100  | 1.10835100  |
| C | 1.37371800  | 1.16578600  | 0.23881400  |
| H | 1.86565400  | 2.03606200  | -0.19998300 |
| H | 1.70844900  | 1.05966300  | 1.27474500  |
| C | -4.27088300 | -1.62818200 | 0.23988600  |
| H | -4.59810600 | -1.38368300 | 1.25656300  |
| H | -4.77136200 | -0.94610200 | -0.45107800 |
| H | -4.62740100 | -2.64378800 | 0.03666800  |

H 1.91386900 -1.78068400 0.66802000



**TS2(III)**

|   |             |             |             |
|---|-------------|-------------|-------------|
| C | -0.61948100 | -3.18386600 | 0.16299600  |
| C | -0.35623000 | -1.90271100 | -0.34955100 |
| C | -1.41659000 | -1.07436900 | -0.74177100 |
| C | -2.72304400 | -1.52760800 | -0.60149200 |
| C | -3.00746000 | -2.79633800 | -0.08464300 |
| C | -1.92689600 | -3.61558200 | 0.29042500  |
| H | 0.21058000  | -3.81851000 | 0.46292100  |
| H | -1.23526100 | -0.09746300 | -1.17792300 |
| H | -3.54217600 | -0.88057900 | -0.90613500 |
| H | -2.12339800 | -4.60577200 | 0.69404700  |
| N | 0.96965000  | -1.48457400 | -0.41934600 |
| C | 1.38108100  | -0.22776200 | -0.62514200 |
| H | 0.76088500  | 0.42390600  | -1.23131600 |
| C | 2.84893100  | 0.01010500  | -0.75237800 |
| O | 3.30269400  | 0.98484400  | -1.31862200 |
| O | 3.54741700  | -0.95380000 | -0.15560100 |
| C | 4.99665400  | -0.76651200 | -0.09149600 |
| H | 5.33268200  | -0.38121700 | -1.05662600 |
| H | 5.38178400  | -1.77744200 | 0.04514000  |
| C | 5.35023100  | 0.14396300  | 1.05088200  |
| H | 6.43727600  | 0.23712000  | 1.11763700  |
| H | 4.93423700  | 1.14550700  | 0.90883200  |
| H | 4.98530900  | -0.25637700 | 2.00068100  |
| C | -2.43424900 | 2.13018100  | 0.96972000  |
| C | -1.05558800 | 2.08983700  | 0.67086300  |
| C | -0.52345600 | 3.05594100  | -0.21096500 |
| C | -1.34642700 | 4.02591400  | -0.76349800 |
| C | -2.70860800 | 4.05823300  | -0.44721300 |
| C | -3.25092800 | 3.10839200  | 0.42168600  |
| H | -2.84673700 | 1.37804300  | 1.63913900  |
| H | 0.53335400  | 3.03949800  | -0.46609800 |
| H | -0.93064400 | 4.76279300  | -1.44458700 |
| H | -3.34658400 | 4.82306000  | -0.88129000 |
| H | -4.30936100 | 3.13175700  | 0.66398800  |
| C | -0.25831900 | 1.04978000  | 1.26372300  |
| H | -0.80575400 | 0.32220100  | 1.86409300  |
| C | 1.10837600  | 0.88603000  | 1.13234600  |
| H | 1.71666500  | 1.72202300  | 0.79300400  |
| H | 1.60393800  | 0.18005700  | 1.79399100  |
| C | -4.41279400 | -3.27841300 | 0.06060600  |
| H | -4.59208200 | -4.16564000 | -0.55686900 |
| H | -4.62545000 | -3.57233200 | 1.09420400  |
| H | -5.13362600 | -2.51123500 | -0.23169800 |

H

1.65980800

-2.13430100

-0.04851000

**2. The number of imaginary frequencies and Electronic Energy + Zero-point Energy Correction for the optimized transition states obtained at the M06-2X-D3/6-31+G(d,p) level of theory in the process.**

Table 1. The number of imaginary frequencies and the relative electronic energy in the reaction of R1+R2 to P in path I.

| Transition states | Imaginary frequency (cm <sup>-1</sup> ) | Electronic Energy + Zero-point Energy Correction(a.u) |
|-------------------|-----------------------------------------|-------------------------------------------------------|
| TS0(1)            | -1132.56                                | -8620.58269                                           |
| TS0(2)            | -1109.12                                | -8620.55564                                           |
| TS0(3)            | -1007.70                                | -8620.49262                                           |
| TS1a              | -1472.56                                | -9102.94777                                           |
| TS1b              | -1455.61                                | -784.25539                                            |
| TS2(I)c           | -1175.23                                | -9102.31633                                           |
| TS2(I)d           | -1677.73                                | -783.61772                                            |
| TS3(I)e           | -166.34                                 | -941.65696                                            |
| TS3(I)f-1         | -466.06                                 | -2324.36164                                           |
| TS3(I)f-2         | -379.68                                 | -2324.34315                                           |
| TS3(I)g           | -448.13                                 | -1863.98385                                           |
| TS3(I)h-1         | -308.25                                 | -1863.93082                                           |
| TS3(I)h-2         | -666.02                                 | -1863.89867                                           |
| TS3(I)i           | -205.05                                 | -2324.37532                                           |
| TS4(I)j           | -258.76                                 | -1091.98441                                           |
| TS4(I)k           | -968.98                                 | -1091.98284                                           |
| TS5(I)j           | -1674.42                                | -1090.82300                                           |

Table 2. The number of imaginary frequencies and the relative electronic energy in the reaction of R1+R2 to P in path II and III.

| Transition states | Imaginary frequency (cm <sup>-1</sup> ) | Electronic Energy + Zero-point Energy Correction(a.u) |
|-------------------|-----------------------------------------|-------------------------------------------------------|
| TS2(II)           | -549.37                                 | -942.26042                                            |
| TS3(II)           | -191.44                                 | -942.11771                                            |
| TS2(III)          | -442.69                                 | -942.11394                                            |
